# Supplementary material for: Interactive association of the dietary oxidative balance score and cardiovascular disease with mortality in older adults: evidence from NHANES
Source: Royal Society of Chemistry journal article supplement (doi:10.1039/d4fo01515k), 2024-01-01
Supplement: d4fo01515k1.pdf [file d4fo01515k1.pdf]

**Figure S1.** Flowchart of participants selection.

**Table S1.** The DOBS assignment scheme.

**Table S2.** Association of single CVD or DOBS status with all-cause mortality among US older adults, NHANES 2003-2014 (n=9059).

**Table S3.** Joint association of CVD and DOBS status with all-cause mortality among US older adults, NHANES 2003-2014 (n=9059).

**Table S4.** Association of DOBS status with all-cause mortality among US older adults in CVD and non-CVD cohorts, NHANES 2003-2014 (n=9059).

**Table S5.** Sensitivity Analyses of the association between single CVD or DOBS status and all-cause mortality among US older adults excluding participants who died within two years of follow-up, NHANES 2003-2014 (n=8616).

**Table S6.** Sensitivity Analyses of the joint association between CVD and DOBS status and all-cause mortality among US older adults excluding participants who died within two years of follow-up, NHANES 2003-2014 (n=8616).

**Table S7.** Sensitivity Analyses of the association between DOBS status and all-cause mortality among US older adults in CVD and non-CVD cohorts excluding participants who died within two years of follow-up, NHANES 2003-2014 (n=8616).
