# Supplementary material for: Interactive association of the dietary oxidative balance score and cardiovascular disease with mortality in older adults: evidence from NHANES
Source: Royal Society of Chemistry journal article supplement (doi:10.1039/d4fo01515k), 2024-01-01
Supplement: d4fo01515k2.pdf [file d4fo01515k2.pdf]

Figure S1

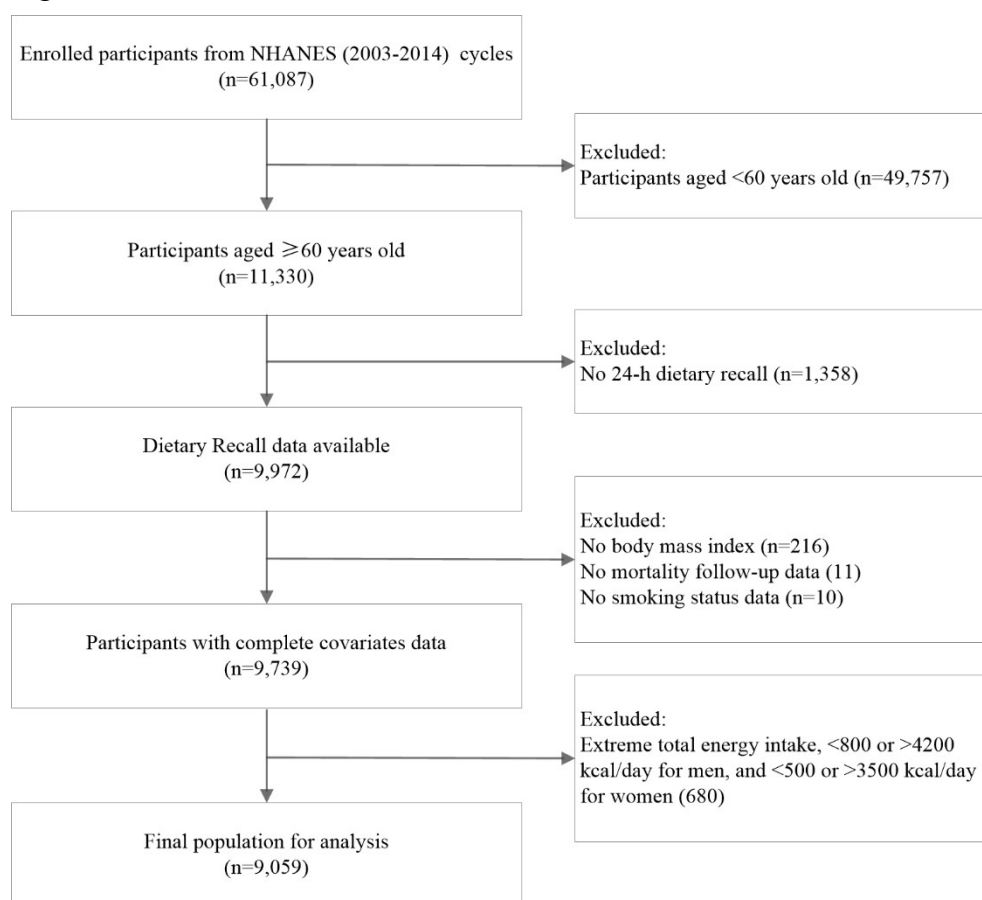

Table S1. The DOBS assignment scheme.

| DOBS components     | Property | DOBS score |                  |         |
|---------------------|----------|------------|------------------|---------|
|                     |          | 0          | 1                | 2       |
| Dietary fiber (g/d) | A        | ≤12.00     | >12.00, ≤18.10   | >18.10  |
| Carotene (μg/d)     | A        | ≤178.47    | >178.47, ≤241.68 | >241.68 |
| Vitamin B2 (mg/d)   | A        | ≤1.53      | >1.53, ≤2.16     | >2.16   |
| Niacin (mg/d)       | A        | ≤16.62     | >16.62, ≤23.69   | >23.69  |
| Vitamin B6 (mg/d)   | A        | ≤1.37      | >1.37, ≤2.02     | >2.02   |
| Folic acid (μg/d)   | A        | ≤277.00    | >277.00, ≤404.00 | >404.00 |
| Vitamin B12 (μg/d)  | A        | ≤2.96      | >2.96, ≤5.14     | >5.14   |
| Vitamin C (mg/d)    | A        | ≤46.40     | >46.40, ≤99.13   | >99.13  |
| Vitamin E (mg/d)    | A        | ≤4.75      | >4.75, ≤7.50     | >7.50   |
| Calcium (mg/d)      | A        | ≤603.50    | >603.50, ≤901.00 | >901.00 |
| Magnesium (mg/d)    | A        | ≤214.00    | >214.00, ≤295.50 | >295.50 |
| Zinc (mg/d)         | A        | ≤7.63      | >7.63, ≤11.18    | >11.18  |
| Copper (mg/d)       | A        | ≤0.91      | >0.91, ≤1.27     | >1.27   |
| Selenium (μg/d)     | A        | ≤75.90     | >75.90, ≤107.37  | >107.37 |
| Total fat (g/d)     | P        | >74.59     | ≤74.59, >50.86   | ≤50.86  |
| Iron (mg/d)         | P        | >15.49     | ≤15.49, >10.64   | ≤10.64  |

A, Anti-oxidant; P, Pro-oxidant. DOBS, Dietary Oxidative Balance Score.

Table S2. Association of single CVD or DOBS status with all-cause mortality among US older adults, NHANES 2003-2014 (n=9059).

| Morality outcome  | death (%)    | Hazard ratio (95% CI)    |                         |                          |
|-------------------|--------------|--------------------------|-------------------------|--------------------------|
|                   |              | Crude model              | Model 1                 | Model 2                  |
| <b>All-causes</b> |              |                          |                         |                          |
| Non-CVD           | 2118 (31.06) | Ref.                     | Ref.                    | Ref.                     |
| CVD               | 1262 (56.36) | 2.54 (2.31-2.81), <0.001 | 1.87 (1.7-2.05), <0.001 | 1.64 (1.50-1.80), <0.001 |
| Anti-oxidant diet | 632 (32.49)  | Ref.                     | Ref.                    | Ref.                     |
| Pro-oxidant diet  | 2748 (38.63) | 1.38 (1.22-1.57), <0.001 | 1.41 (1.24-1.6), <0.001 | 1.25 (1.09-1.43), 0.001  |

Crude model, adjusted for no covariates. Model 1, adjusted for age and sex. Model 2, adjusted for model 1 plus ethnicity, marital status, education, smoking status, physical activity, BMI, hypertension, diabetes mellitus, and dietary energy intake. CVD, cardiovascular disease.

Table S3. Joint association of CVD and DOBS status with all-cause mortality among US older adults, NHANES 2003-2014 (n=9059).

| Morality outcome            | death (%)    | Hazard ratio (95% CI)    |                          |                          |
|-----------------------------|--------------|--------------------------|--------------------------|--------------------------|
|                             |              | Crude model              | Model 1                  | Model 2                  |
| <b>All-causes</b>           |              |                          |                          |                          |
| Non-CVD & Anti-oxidant diet | 413 (27.37)  | Ref.                     | Ref.                     | Ref.                     |
| Non-CVD & Pro-oxidant diet  | 1705 (32.10) | 1.27 (1.10-1.47), 0.001  | 1.26 (1.10-1.44), 0.001  | 1.13 (0.97-1.31), 0.114  |
| CVD & Anti-oxidant diet     | 219 (50.23)  | 2.17 (1.74-2.70), <0.001 | 1.50 (1.21-1.85), <0.001 | 1.30 (1.05-1.62), 0.016  |
| CVD & Pro-oxidant diet      | 1043 (57.85) | 3.33 (2.81-3.95), <0.001 | 2.45 (2.09-2.88), <0.001 | 1.96 (1.64-2.34), <0.001 |

Crude model, adjusted for no covariates. Model 1, adjusted for age and sex. Model 2, adjusted for model 1 plus ethnicity, marital status, education, smoking status, physical activity, BMI, hypertension, diabetes mellitus, and dietary energy intake. CVD, cardiovascular disease.

Table S4. Association of DOBS status with all-cause mortality among US older adults in CVD and non-CVD cohorts, NHANES 2003-2014 (n=9059).

| Morality outcome  | death (%)    | Hazard ratio (95% CI)       |                             |                            | P for interaction in Model 2 |
|-------------------|--------------|-----------------------------|-----------------------------|----------------------------|------------------------------|
|                   |              | Crude model                 | Model 1                     | Model 2                    |                              |
| <b>All-causes</b> |              |                             |                             |                            |                              |
| Non-CVD cohorts   |              |                             |                             |                            |                              |
| Anti-oxidant diet | 413 (27.37)  | Ref.                        | Ref.                        | Ref.                       | 0.015                        |
| Pro-oxidant diet  | 1705 (32.10) | 1.27 (1.10-1.47),<br>0.001  | 1.29 (1.13-1.47),<br><0.001 | 1.13 (0.97-1.31),<br>0.130 |                              |
| CVD cohorts       |              |                             |                             |                            |                              |
| Anti-oxidant diet | 219 (50.23)  | Ref.                        | Ref.                        | Ref.                       |                              |
| Pro-oxidant diet  | 1043 (57.85) | 1.53 (1.24-1.89),<br><0.001 | 1.53 (1.23-1.90),<br><0.001 | 1.48 (1.18-1.86),<br>0.001 |                              |

Crude model, adjusted for no covariates. Model 1, adjusted for age and sex. Model 2, adjusted for model 1 plus ethnicity, marital status, education, smoking status, physical activity, BMI, hypertension, diabetes mellitus, and dietary energy intake. CVD, cardiovascular disease.

Table S5. Sensitivity Analyses of the association between single CVD or DOBS status and all-cause mortality among US older adults excluding participants who died within two years of follow-up, NHANES 2003-2014 (n=8616).

| Morality outcome  | death (%)    | Hazard ratio (95% CI)    |                          |                          |
|-------------------|--------------|--------------------------|--------------------------|--------------------------|
|                   |              | Crude model              | Model 1                  | Model 2                  |
| <b>All-causes</b> |              |                          |                          |                          |
| Non-CVD           | 1884 (28.61) | Ref.                     | Ref.                     | Ref.                     |
| CVD               | 1053 (51.87) | 2.46 (2.23-2.71), <0.001 | 1.81 (1.65-1.98), <0.001 | 1.60 (1.45-1.75), <0.001 |
| Anti-oxidant diet | 567 (30.16)  | Ref.                     | Ref.                     | Ref.                     |
| Pro-oxidant diet  | 2370 (35.18) | 1.33 (1.16-1.51), <0.001 | 1.36 (1.20-1.55), <0.001 | 1.23 (1.07-1.42), 0.004  |

Crude model, adjusted for no covariates. Model 1, adjusted for age and sex. Model 2, adjusted for model 1 plus ethnicity, marital status, education, smoking status, physical activity, BMI, hypertension, diabetes mellitus, and dietary energy intake. CVD, cardiovascular disease.

Table S6. Sensitivity Analyses of the joint association between CVD and DOBS status and all-cause mortality among US older adults excluding participants who died within two years of follow-up, NHANES 2003-2014 (n=8616).

| Morality outcome            | death (%)    | Hazard ratio (95% CI)    |                          |                          |
|-----------------------------|--------------|--------------------------|--------------------------|--------------------------|
|                             |              | Crude model              | Model 1                  | Model 2                  |
| <b>All-causes</b>           |              |                          |                          |                          |
| Non-CVD & Anti-oxidant diet | 380 (25.75)  | Ref.                     | Ref.                     | Ref.                     |
| Non-CVD & Pro-oxidant diet  | 1504 (29.43) | 1.23 (1.06-1.44), 0.007  | 1.23 (1.08-1.41), 0.003  | 1.12 (0.97-1.31), 0.132  |
| CVD & Anti-oxidant diet     | 187 (46.29)  | 2.14 (1.69-2.71), <0.001 | 1.47 (1.17-1.86), 0.001  | 1.28 (1.01-1.63), 0.041  |
| CVD & Pro-oxidant diet      | 866 (53.26)  | 3.13 (2.65-3.69), <0.001 | 2.32 (1.99-2.71), <0.001 | 1.90 (1.60-2.26), <0.001 |

Crude model, adjusted for no covariates. Model 1, adjusted for age and sex. Model 2, adjusted for model 1 plus ethnicity, marital status, education, smoking status, physical activity, BMI, hypertension, diabetes mellitus, and dietary energy intake. CVD, cardiovascular disease.

Table S7. Sensitivity Analyses of the association between DOBS status and all-cause mortality among US older adults in CVD and non-CVD cohorts excluding participants who died within two years of follow-up, NHANES 2003-2014 (n=8616).

| Morality outcome  | death (%)    | Hazard ratio (95% CI)      |                           |                            | P for interaction in Model 2 |
|-------------------|--------------|----------------------------|---------------------------|----------------------------|------------------------------|
|                   |              | Crude model                | Model 1                   | Model 2                    |                              |
| <b>All-causes</b> |              |                            |                           |                            | 0.040                        |
| Non-CVD cohorts   |              |                            |                           |                            |                              |
| Anti-oxidant diet | 380 (25.75)  | Ref.                       | Ref.                      | Ref.                       |                              |
| Pro-oxidant diet  | 1504 (29.43) | 1.23 (1.06-1.44),<br>0.007 | 1.26 (1.1-1.44),<br>0.001 | 1.11 (0.95-1.30),<br>0.198 |                              |
| CVD cohorts       |              |                            |                           |                            |                              |
| Anti-oxidant diet | 187 (46.29)  | Ref.                       | Ref.                      | Ref.                       |                              |
| Pro-oxidant diet  | 866 (53.26)  | 1.46 (1.16-1.84),<br>0.001 | 1.49 (1.16-1.9),<br>0.002 | 1.51 (1.17-1.95),<br>0.002 |                              |

Crude model, adjusted for no covariates. Model 1, adjusted for age and sex. Model 2, adjusted for model 1 plus ethnicity, marital status, education, smoking status, physical activity, BMI, hypertension, diabetes mellitus, and dietary energy intake. CVD, cardiovascular disease.
